# Supplementary material
Source: PubMed Central journal article supplement (PMC3084350)
Supplement: NIHMS254348-supplement-1_si_001.pdf [file NIHMS254348-supplement-1_si_001.pdf]

## Supporting Information

### Gas Sensing with High Resolution LSPR Spectroscopy

Julia M. Bingham, Jeffrey N. Anker<sup>†</sup>, Lauren E. Kreno, Richard P. Van Duyne  
*Department of Chemistry, Northwestern University, 2145 Sheridan Road, Evanston,  
Illinois 60208*

**Supplementary Data: Described in text, shown below.**

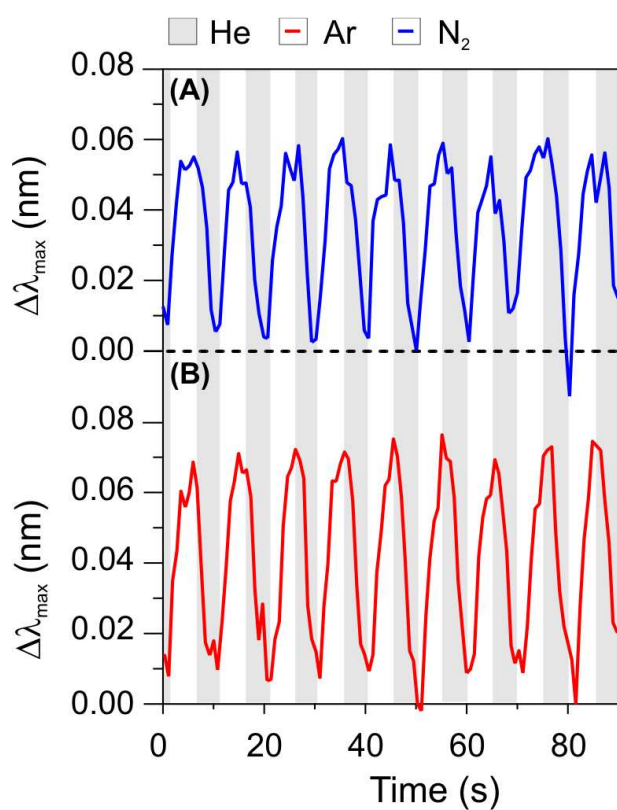

**Figure S1.** (A) Plot of LSPR extinction maximum as a function of time as the gas is switched between He (g) (shaded areas) and Ar (g) and (B) He(g) and N<sub>2</sub>(g). Changes in RI of  $2.45 \times 10^{-4}$  and  $2.62 \times 10^{-4}$  RIU between He/Ar and He/N<sub>2</sub>, respectively, were detected using 5 s switching intervals.

<sup>†</sup> Current Address: Department of Chemistry and Center for Optical Materials Research and Technology, Clemson University, Clemson, SC 29634
